# Supplementary material for: Intraperitoneal injection (IP), Intravenous injection (IV) or anal injection (AI)? Best way for mesenchymal stem cells transplantation for colitis
Source: PubMed Central journal article supplement (PMC4973258; doi:10.1038/srep30696), 2016-08-04
Supplement: srep30696-s1.pdf [file srep30696-s1.pdf]

**Intraperitoneal injection (IP), Intravenous injection (IV) or anal injection (AI)? Best way for mesenchymal stem cells transplantation for colitis**

Min Wang, Cong Liang, Hao Hu, Lin Zhou,

Bing Xu, Xin Wang, Ying Han, Yongzhan Nie, Shuyun Jia,

Jie Liang, Kaichun Wu

**Supplementary methods**

**Characterization of MSCs**

Flow cytometric analysis was used for the characterization of surface protein expression of MSCs. Cells of passage 3-4 are harvested by trypsin digestion and stained for phycoerythrin (PE) conjugated anti-mouse CD73, CD90, CD105, CD34 or fluorescein isothiocyanate (FITC) conjugated anti-mouse CD45 and CD11b antibody. All the antibodies and their isotype were obtained from BD Bioscience.

**MSCs differentiation assay**

Osteoblast, adipocyte and chondrogenic differentiation were initiated by means of specific media. For osteogenic differentiation, the medium contained 0.01  $\mu\text{M}$  dexamethasone, 10 mM  $\beta$ -glycerophosphate, and 5  $\mu\text{M}$  ascorbic acid, while for adipogenic differentiation, medium contained 1  $\mu\text{M}$  dexamethasone, 500  $\mu\text{M}$  isobutylmethylxanthine, 100  $\mu\text{M}$  indomethacin and insulin 10  $\mu\text{g}/\text{mL}$  (all from Sigma Aldrich, St Louis, MO). Intracellular lipid or Calcium deposits can be stained with Oil Red O or Alizarin Red S method. For chondrogenic differentiation, differentiation medium was prepared in DMEM, supplemented with 6.25  $\mu\text{g}/\text{mL}$  insulin, 5  $\mu\text{g}/\text{mL}$  ascorbic acid 2-phosphate and 10  $\text{ng}/\text{mL}$  TGF- $\beta$  (Weikai Bioeng Co. Ltd, Tianjin, China). Proteoglycans presence was verified by toluidine blue after 21 d of induction.

### ***In vivo* clearance of DiR in healthy mice**

10 mL DiR cell labeling solution (PBS based containing 3.5  $\mu\text{g}/\text{mL}$  dye and 0.5% ethanol) were prepared as Methods. 200  $\mu\text{L}$  of labeling solution was injected into BALB/c nude mice by three delivery routes (IP, AI and IV). The whole-body *in vivo* imaging was conducted at 10 min, 1 h, 2 h, 6 h and 24 h after injection by small animal imaging system with same settings (IVIS Kinetics; Caliper Life Science). After imaging, the mice were sacrificed. Main organs (heart, liver, spleen, kidney, and bowel) and blood were harvested and imaged, respectively.

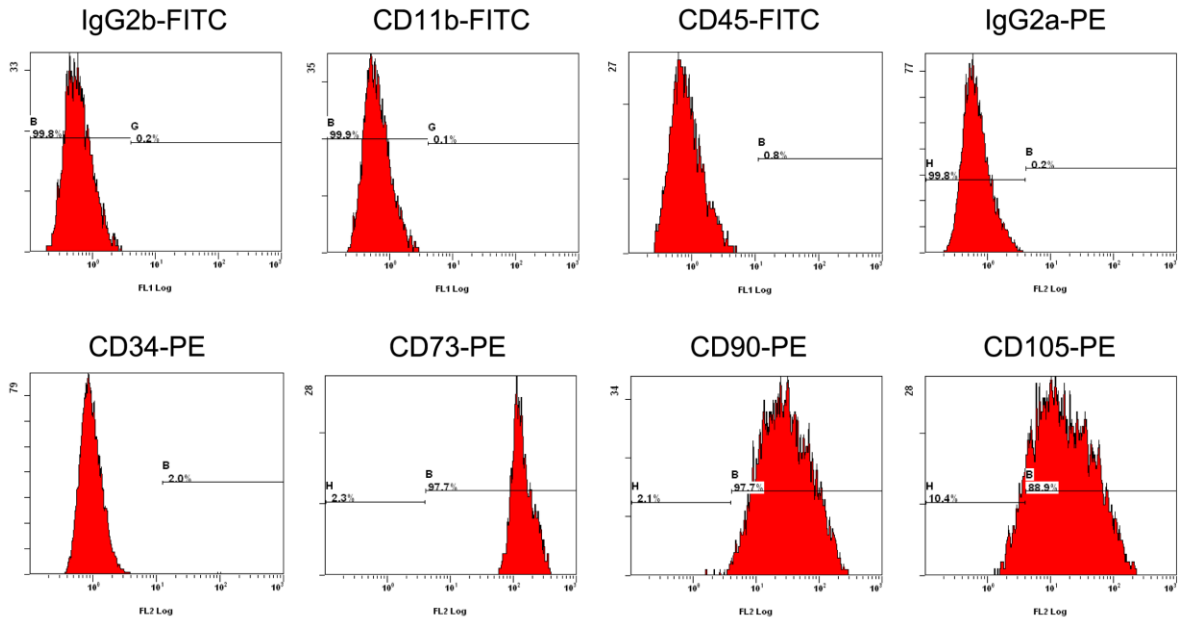

**Supplementary Fig S1.** Flow cytometry analysis for the expression of cell surface antigens of MSCs.

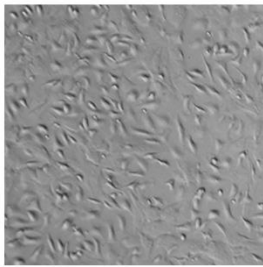

Undifferentiated

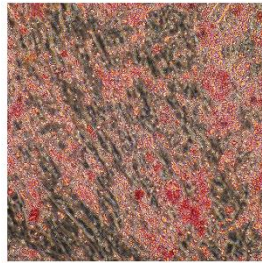

Osteocytes

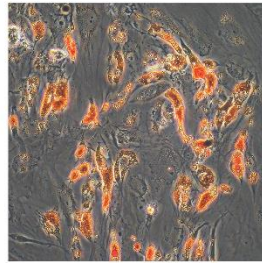

Adipocytes

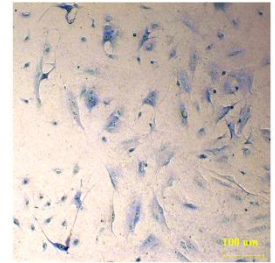

Chondrocytes

**Supplementary Fig S2.** Cell morphological appearance of undifferentiated MSCs and MSCs differentiated into adipocytes, osteocytes and chondrocytes.

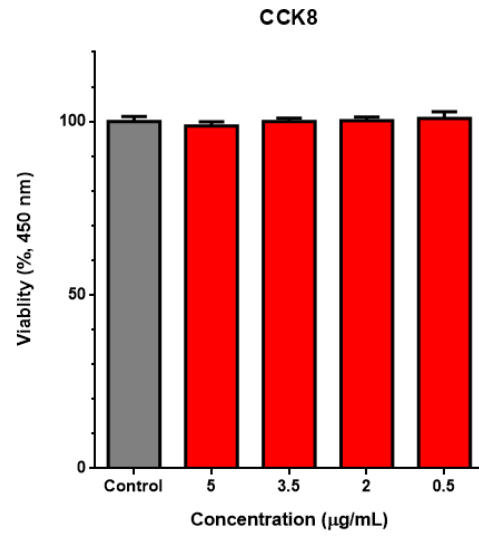

**Supplementary Fig S3.** CCK8 viability analysis of MSCs after different concentration of 1, 1'-dioctadecyl-3,3,3,3'-tetramethylindotricarbocyanine iodide (DiR; DiIC18(7) labeling).

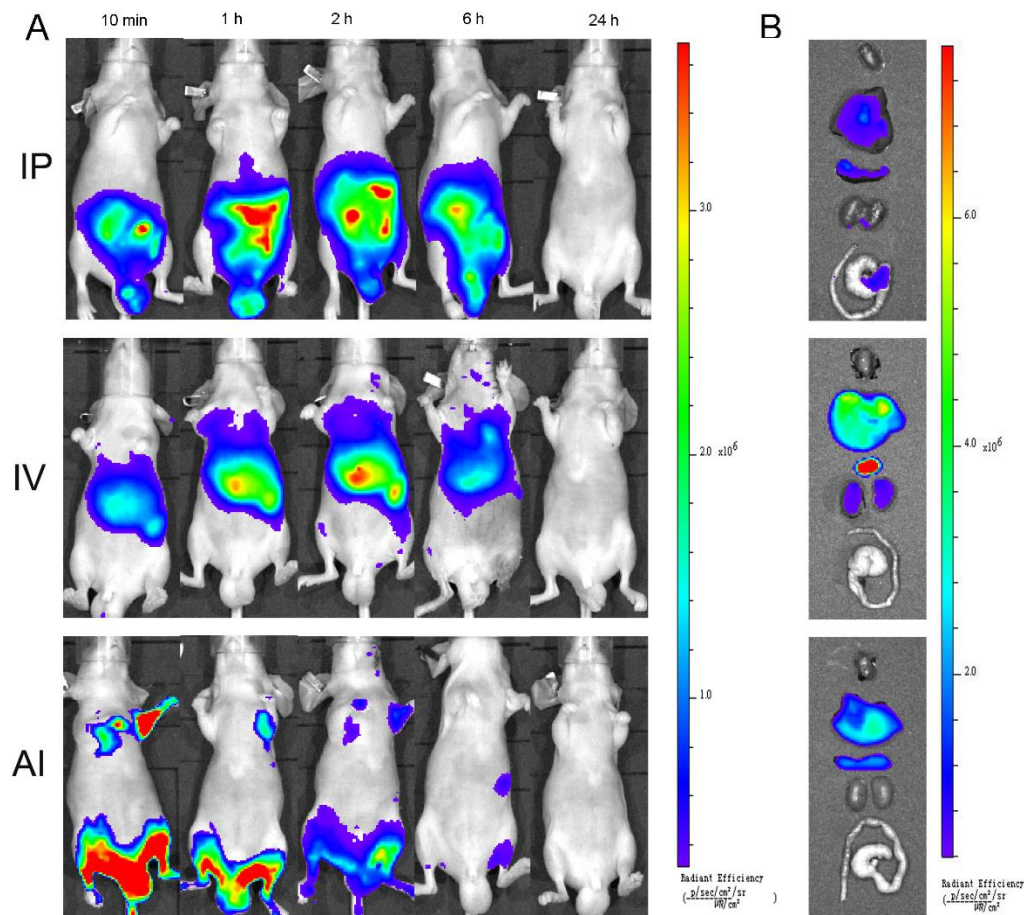

**Supplementary Fig S4.** *In vivo* clearance of free DiR dye in healthy BALB/c nude mice, Imaging was taken at 10 min, 1 h, 2 h, 6 h and 24 h post injection. Free DiR showed quick clearance in body. At 24 h, most of Dye was cleared from body. (A) Upper panel: IP route; Middle panel: IV route; lower panel AI, route (n=3). (B) Representative images of DiR organ distribution in three different routes at 24 h post injection (From top: heart, liver, spleen, kidneys and bowel).

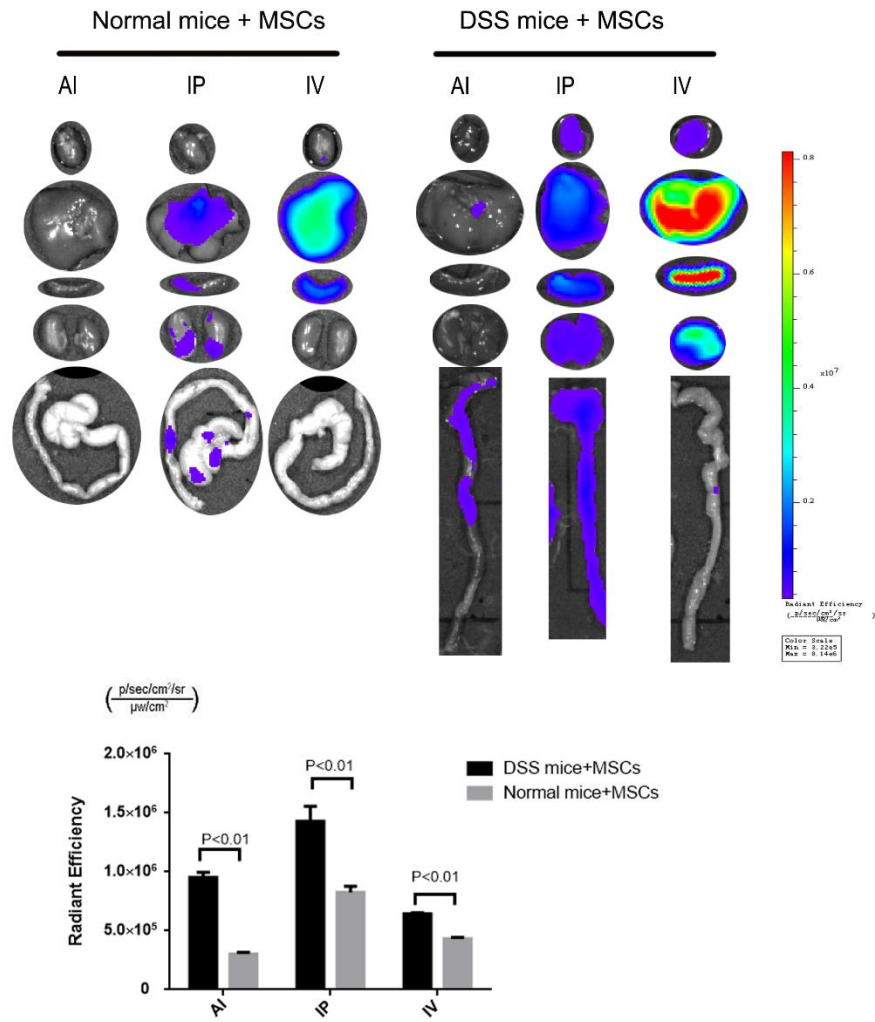

**Supplementary Fig S5.** MSCs distribution in healthy and DSS colitis mice after three different administration routes. (A) Upper panel: representative images of MSCs in 5 main organ after 24 h injection (From top: heart liver, spleen, kidney and bowel); (B) Comparison of fluorescent intensity in bowel of healthy and DSS mice (n=3).

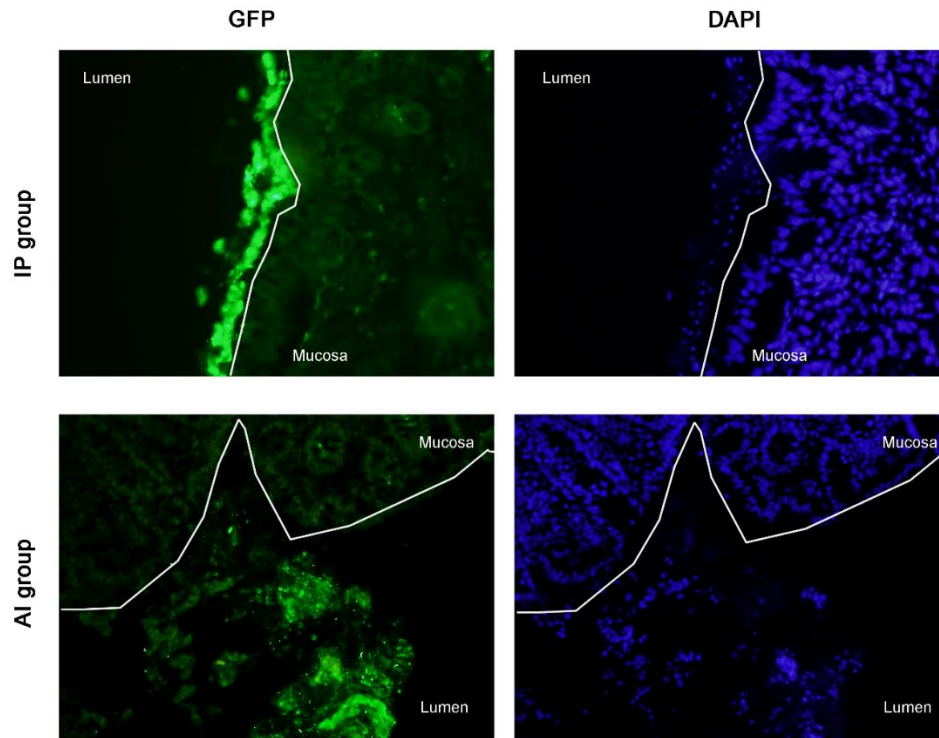

**Supplementary Fig S6.** Morphological appearance of GFP<sup>+</sup> cells in IP and AI group at inflamed colon (magnification  $\times 200$ ).



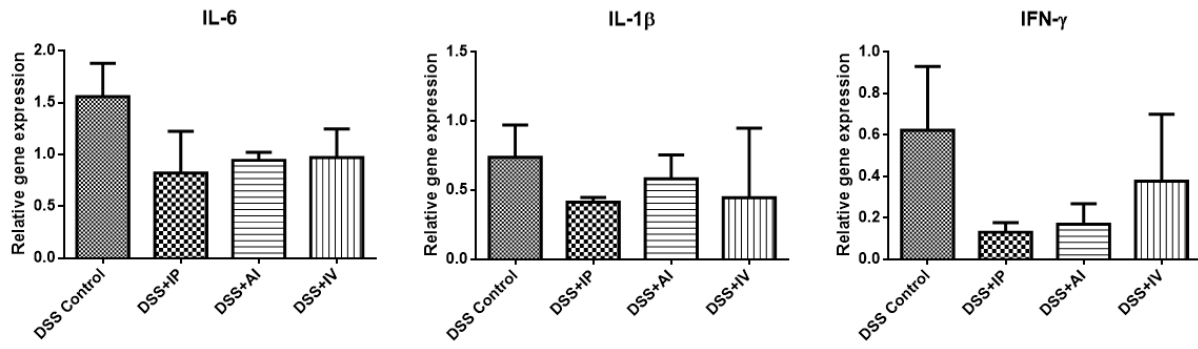

**Supplementary Fig S7.** The colonic mRNA expression of IL-6, IL-1 $\beta$  and IFN- $\gamma$  analyzed by RT-PCR.

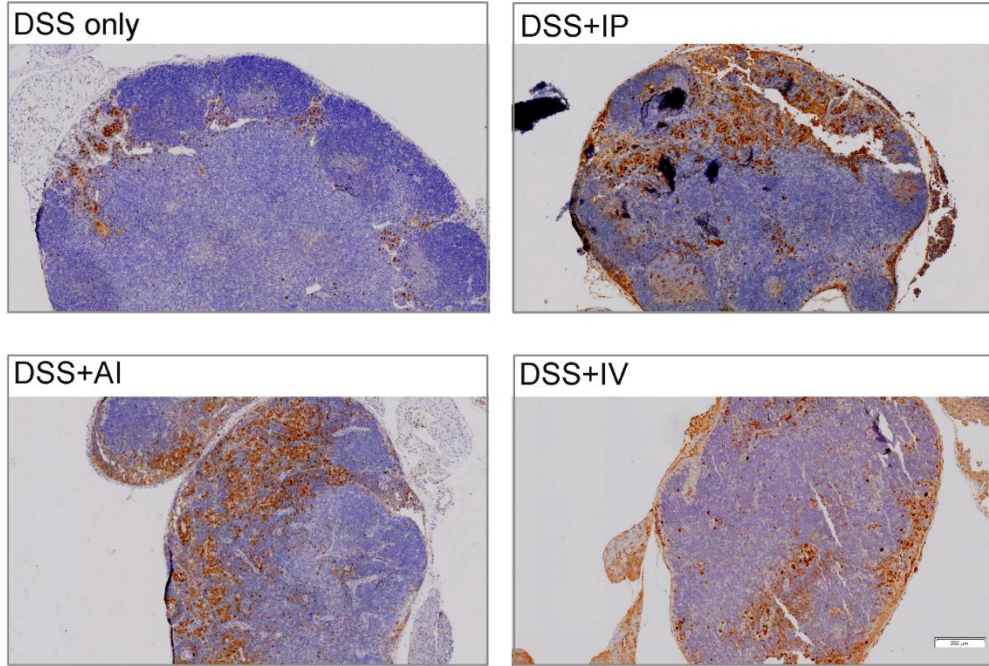

**Supplementary Fig S8.** FoxP3 expression in MLNs. MSCs administration induced more FoxP3<sup>+</sup> cells accumulation than the control, but the inter-group differences were not evident.

**Supplementary Table S1 List of primers for real time PCR**

| <b>GENE</b>                    | <b>Forward primer (5'-3')</b> | <b>Reverse primer (5'-3')</b> |
|--------------------------------|-------------------------------|-------------------------------|
| <b>TNF<math>\alpha</math></b>  | TATGGCCCAGACCCTCACA           | GGAGTAGACAAGGTACAACCCATC      |
| <b>IL-1<math>\beta</math></b>  | TCCAGGATGAGGACATGAGCAC        | GAACGTCACACACCAGCAGGTTA       |
| <b>IL-10</b>                   | GCCAGAGCCACATGCTCCTA          | GATAAGGCTTGGCAACCCAAGTAA      |
| <b>IL-6</b>                    | CCACTTCACAAGTCGGAGGCTTA       | CCAGTTTGGTAGCATCCATCATTTC     |
| <b>IFN-<math>\gamma</math></b> | CGGCACAGTCATTGAAAGCCTA        | GTTGCTGATGGCCTGATTGTC         |
| <b>GAPDH</b>                   | TGTGTCCGTCGTGGATCTGA          | TTGCTGTTGAAGTCGCAGGAG         |
